# Supplementary material
Source: HighWire-hosted journal article supplement (https://bmjopen.bmj.com/content/14/9/e082945)
Supplement: inline-supplementary-material-2 [file inline-supplementary-material-2.pdf]

Appendix 2: Reported Adverse Drug Reactions – sildenafil citrate<sup>50</sup>

| More frequent                                                                         | Less frequent          |
|---------------------------------------------------------------------------------------|------------------------|
| Dizziness                                                                             | Bronchitis             |
| Flushing                                                                              | Cellulitis/Skin rash   |
| Gastro-oesophageal reflux/dyspepsia                                                   | Migraine-like headache |
| Headache requiring analgesia                                                          | Epistaxis              |
| Myalgia/Limb pain                                                                     | Hypo/paraesthesia      |
| Vision changes (blurred, coloured, increased sensitivity) requiring ophthalmic review |                        |
| Vomiting                                                                              |                        |
